# Supplementary material
Source: publisher site journal article supplement (https://www.spandidos-publications.com/2349/downloadSupplementary)

Figure S1. Expression of SphK1 was analyzed between 483 patients with lung adenocarcinoma and 59 healthy controls in The Cancer Genome Atlas dataset. The result revealed that SphK1 expression was higher in patients with lung adenocarcinoma compared with the control group. \* $P < 0.05$ . SphK1, sphingosine kinase 1; LUAD, lung adenocarcinoma; T, tumor; N, normal.

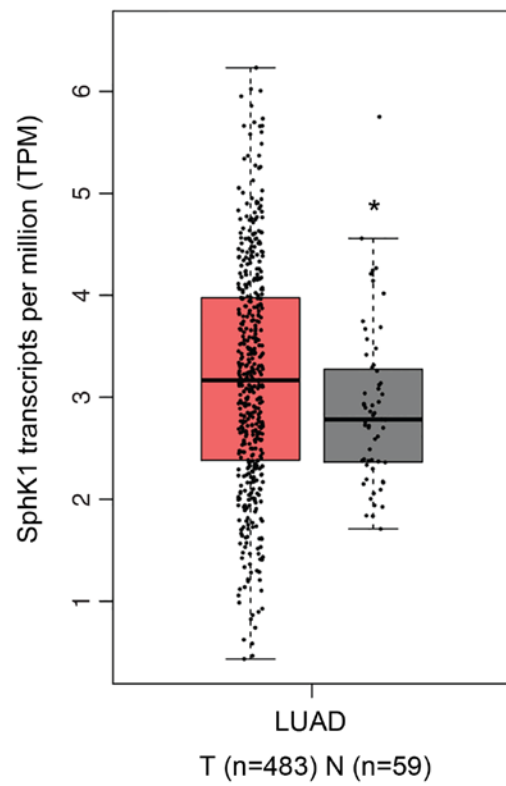

Figure S2. Expression of SphK1 in A549 cells transfected with a lentivirus containing SphK1. \*\*\* $P < 0.001$ . SphK1, sphingosine kinase 1.

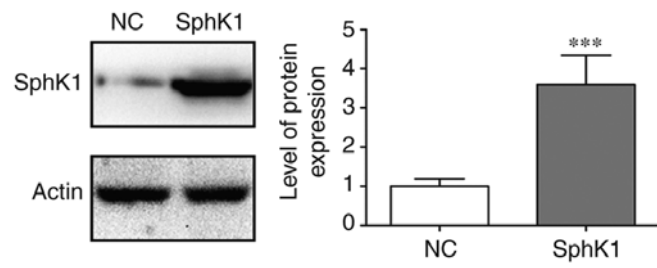

Supplement: Supplementary file 1 [file downloadSupplementary]
